# Supplementary material for: Doxorubicin-conjugated CuS nanoparticles for efficient synergistic therapy triggered by near-infrared light
Source: Royal Society of Chemistry journal article supplement (doi:10.1039/c5dt04842g), 2016-01-01
Supplement: c5dt04842g1.pdf [file c5dt04842g1.pdf]

## Electronic Supplementary Information

### Doxorubicin-conjugated CuS nanoparticles for efficient synergistic therapy triggered by near-infrared light

Huiting Bi, Yunlu Dai\*, Ruichan Lv, Chongna Zhong, Fei He, Shili Gai, Arif Gulzar, Guixin Yang, and Piaoping Yang\*

#### The rough calculations process of the number of DOX molecules released from per CuS-DOX.

The number of DOX molecules released from per CuS-DOX in the sample was determined according to previous method.<sup>1</sup> We obtained the standard curve of DOX,  $y = 18.327x + 0.001$ . In order to determine the density and content, according to the standard curve, the release amount of DOX from nanoparticles can be calculate:

The initial concentration of DOX is 0.5 mg/mL, and the absorbance of supernatant after loading is 8.065. The  $\text{Cu}^{2+}$  concentration of CuS-DOX NPs is about 2.8  $\mu\text{g/mL}$  obtained by ICP-MS.

Loaded concentration  $\Delta X = 0.5 \text{ mg/mL} - (8.065 - 0.001)/18.327 = 0.44 \text{ mg/mL}$ .

The number of DOX can be calculate:

$$n_{\text{DOX}} = \frac{0.44 \text{ mg/mL}}{1000 \times 577.99 \text{ g/mol}} \times 6.02 \times 10^{23} / \text{mol} = 4.58 \times 10^{17} / \text{mL}$$

The quality of CuS:  $m_{\text{CuS}} = \rho V = 4.6 \text{ g/cm}^3 \times \frac{4}{3} \pi (5 \text{ nm} \times 10^{-7})^3 = 7.67 \times 10^{-19} \text{ g}$

$$n_{\text{CuS}} = \frac{2.8 \mu\text{g/mL}}{7.67 \times 10^{-19} \text{ g}} = 3.65 \times 10^{12} / \text{mL}$$

$$R_{\text{DOX}} = \frac{4.58 \times 10^{17} / \text{mL}}{3.65 \times 10^{12} / \text{mL}} = 1.25 \times 10^5$$

About  $1.25 \times 10^5$  of DOX molecules were released from per particle after 24 hour.

### The calculation of the photothermal conversion efficiency.

The photothermal conversion efficiency of CuS was determined according to previous method.<sup>2,3</sup> Detailed calculation was given as following:

Based on the total energy balance for this system:

$$\sum_i m_i c_{p,i} \frac{dT}{dt} = Q_{NPs} + Q_s - Q_{loss} \quad (1)$$

$m$  and  $C_p$  are the mass and heat capacity of solvent (water).  $T$  is the solution temperature.

$Q_{NPs}$  is the photothermal energy input by CuS:

$$Q_{NPs} = I(1 - 10^{-A_\lambda})\eta \quad (2)$$

$I$  is the laser power,  $A_\lambda$  is the absorbance of CuS at the wavelength of 808 nm, and  $\eta$  is the conversion efficiency from the absorbed light energy to thermal energy.  $A_\lambda = \epsilon_\lambda Lc$ , where  $\epsilon_\lambda$  is the wavelength-dependent molar absorptivity,  $L$  is path length, and  $c$  is molar concentration.

$Q_s$  is the heat associated with the light absorbance of the solvent, which is measured independently to be  $Q_s = (5.4 \times 10^{-4}) I J s^{-1}$  using pure water without CuS.

$Q_{loss}$  is thermal energy lost to the surroundings:

$$Q_{loss} = hA\Delta T \quad (3)$$

$h$  is the heat transfer coefficient,  $A$  is the surface area of the container, and  $\Delta T$  is the temperature change, which is defined as  $T - T_{surr}$  ( $T$  and  $T_{surr}$  are the solution temperature and ambient temperature of the surroundings, respectively).

At the maximum steady-state temperature, the heat input is equal to the heat output, that is:

$$Q_{NPs} + Q_s = Q_{loss} = hA\Delta T_{max} \quad (4)$$

$\Delta T_{max}$  is the temperature change at the maximum steady-state temperature. According

to the Eq.2 and Eq.4, the photothermal conversion efficiency ( $\eta$ ) can be determined:

$$\eta = \frac{hA\Delta T_{max} - Q_s}{I(1 - 10^{-A_\lambda})} \quad (5)$$

In this equation, only  $hA$  is unknown for calculation. In order to get the  $hA$ , we herein introduce  $\theta$ , which is defined as the ratio of  $\Delta T$  to  $\Delta T_{max}$ :

$$\theta = \frac{\Delta T}{\Delta T_{max}} \quad (6)$$

Substituting Eq.6 into Eq.1 and rearranging Eq.1:

$$\frac{d\theta}{dt} = \frac{hA}{\sum_i m_i C_{p,i}} \left[ \frac{Q_{NPs} + Q_s}{hA\Delta T_{max}} - \theta \right] \quad (7)$$

When the laser was shut off, the  $Q_{NPs} + Q_s = 0$ , Eq.7 changed to:

$$dt = - \frac{\sum_i m_i C_{p,i}}{hA} \frac{d\theta}{\theta} \quad (8)$$

Integrating Eq.8 gives the expression:

$$t = - \frac{\sum_i m_i C_{p,i}}{hA} \ln \theta \quad (9)$$

Thus,  $hA$  can be determined by applying the linear time data from the cooling period vs  $-\ln \theta$

(Fig. S2). Substituting  $hA$  value into Eq.5, the photothermal conversion efficiency ( $\eta$ ) of CuS solution can be calculated.

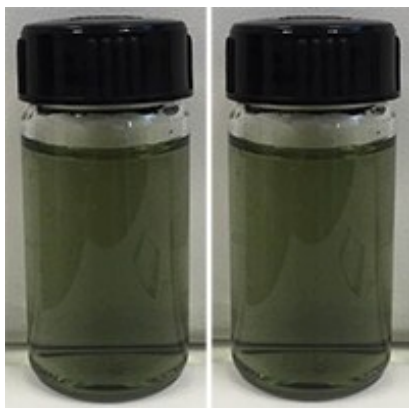

**Fig. S1** CuS-DOX NPs dispersed in water before and after 24 h.

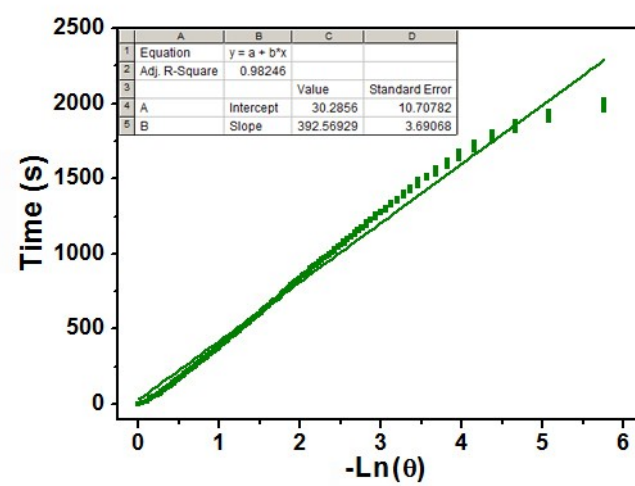

**Fig. S2** Linear time data versus  $-\ln \theta$  obtained from the cooling period of Fig. 2b.

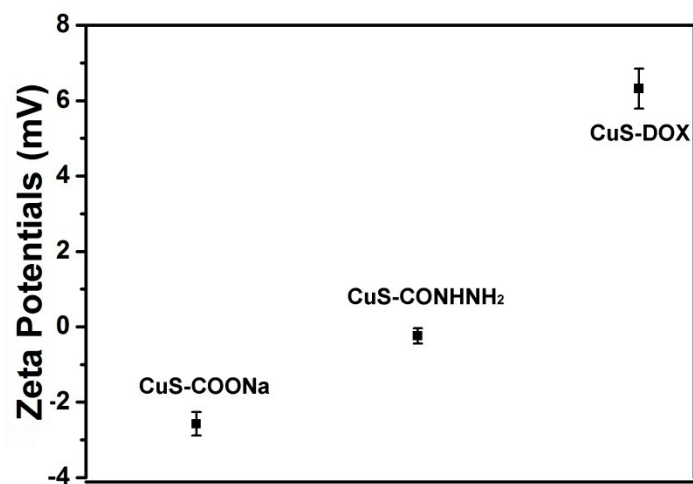

**Fig. S3** Zeta potentials of CuS NPs, CuS-CONH<sub>2</sub> NPs and CuS-DOX NPs.

#### Notes and references

1. Y. Dai, H. Xiao, J. Liu, Q. Yuan, P. A. Ma, D. Yang, C. Li, Z. Cheng, Z. Hou, P. Yang and J. Lin, *J. Am. Chem. Soc.*, 2013, **135**, 18920-18929.
2. Y. Liu, K. Ai, J. Liu, M. Deng, H. He and L. Lu, *Adv. Mater.*, 2013, **25**, 1353-1359.
3. D. K. Roper, W. Ahn and M. Hoepfner, *J. Phys. Chem. C*, 2007, **111**, 3636-3641.
